# Supplementary material
Source: PubMed Central journal article supplement (PMC4711141)
Supplement: AEM.02517-15_zam999116839so1.pdf [file AEM.02517-15_zam999116839so1.pdf]

|                | Gene Name   | Nucleotide Identity |
|----------------|-------------|---------------------|
| <i>sgr6646</i> | <i>metX</i> | 91%                 |
| <i>sgr6647</i> | <i>metY</i> | 93%                 |
| <i>sgr2579</i> | <i>metB</i> | 96%                 |
| <i>sgr3417</i> | <i>malY</i> | 89%                 |
| <i>sgr5847</i> | <i>metH</i> | 96%                 |
| <i>sgr1212</i> | <i>metE</i> | 90%                 |
| <i>sgr6058</i> | <i>metK</i> | 96%                 |
| <i>sgr4513</i> | <i>sahh</i> | 97%                 |
| <i>sgr4452</i> | <i>mtcB</i> | 96%                 |
| <i>sgr3660</i> | <i>mtcC</i> | 93%                 |

**Supplemental Table S1.** Comparing the key sulfur amino acid metabolic genes of ATCC 700974 with those of NBRC 13350 by BLASTN.

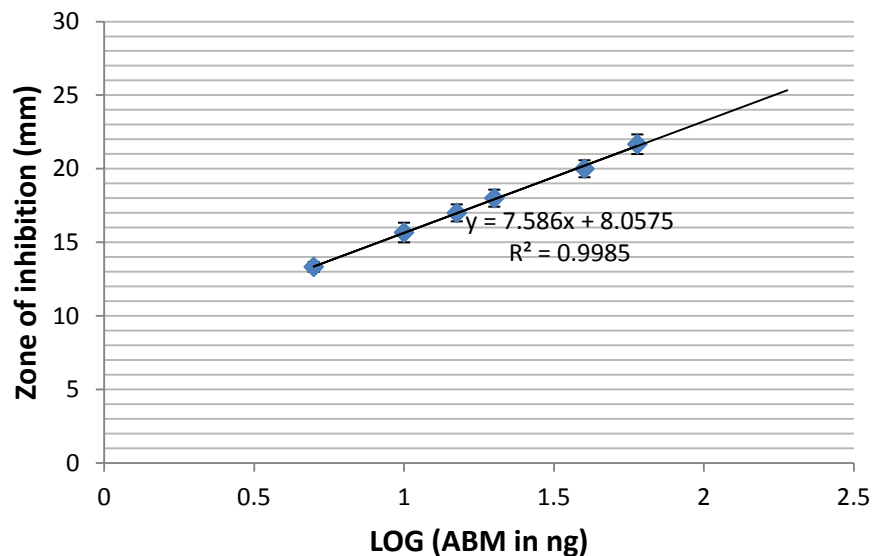

**Supplemental Fig S1.** A semi-log plot of the diameter of zone of inhibition vs. the amount of pure ABM used in the bioassay.

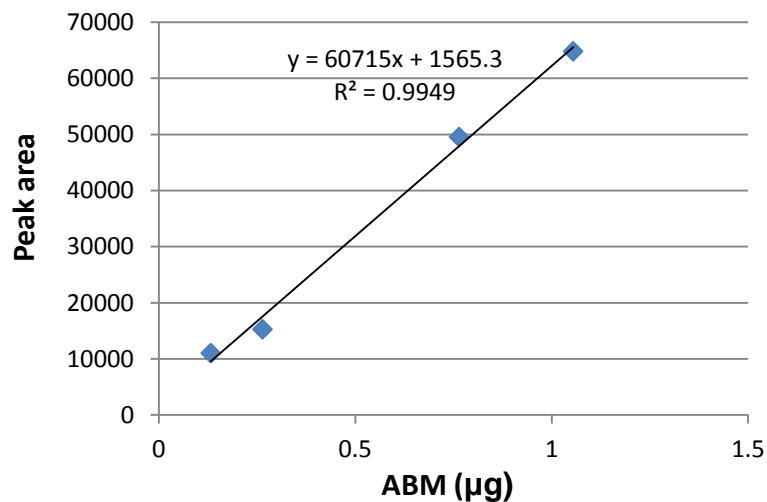

**Supplemental Fig S2.** HPLC quantification curve of pure ABM. The peak was detected at wavelength 425 nm.

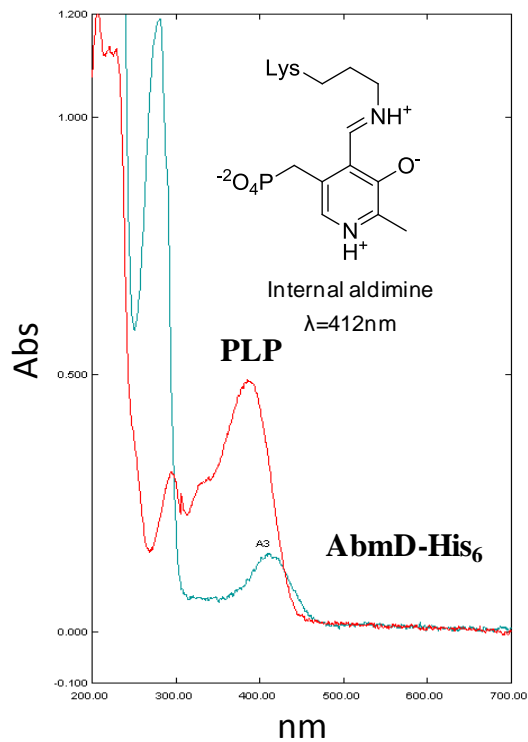

**Supplemental Fig S3.** UV-vis absorption spectra of pyridoxal 5'-phosphate and purified AbmD in pH 8.0, 50 mM  $\text{NaH}_2\text{PO}_4$  buffer.

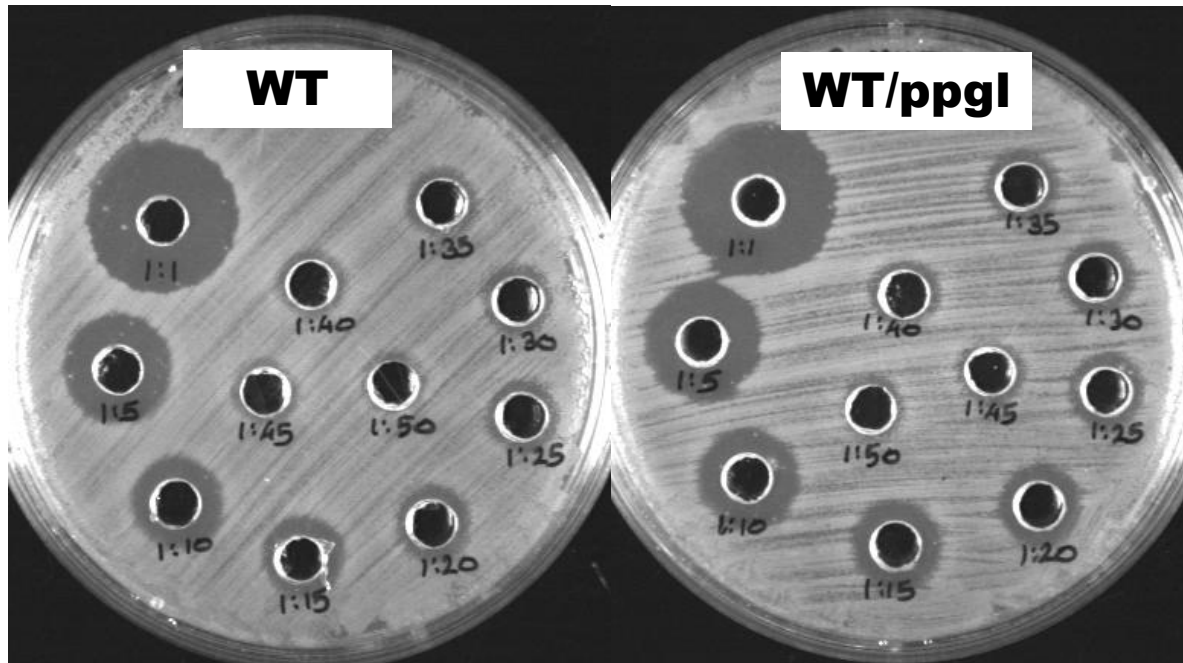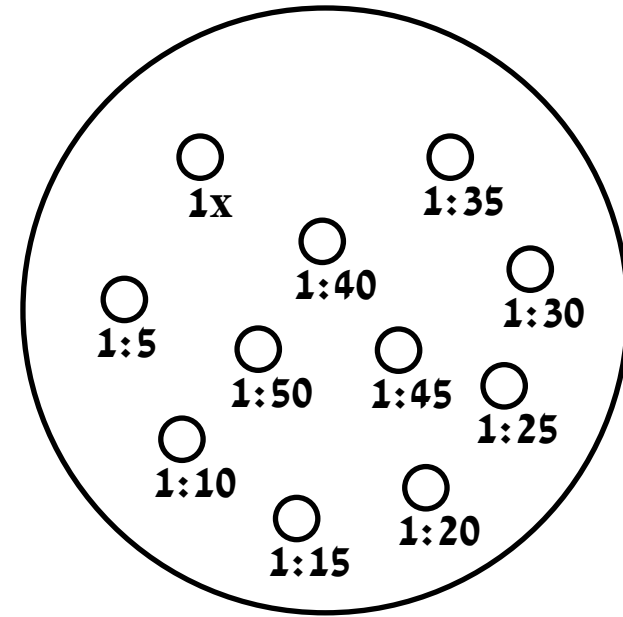

**Supplemental Fig S4.** Bioassay plates for determining the ABM titer of WT *S. griseus* fermented in the absence or presence of 9 mM propargylglycine (ppgl). The plate template is shown on the right. The ratio below each well is a dilution factor. The dilution was made with sterile water, and 20- $\mu$ l fermentation broth (1x) or dilute solution was loaded in each well. For example, 1:5 means the original broth was diluted five times.

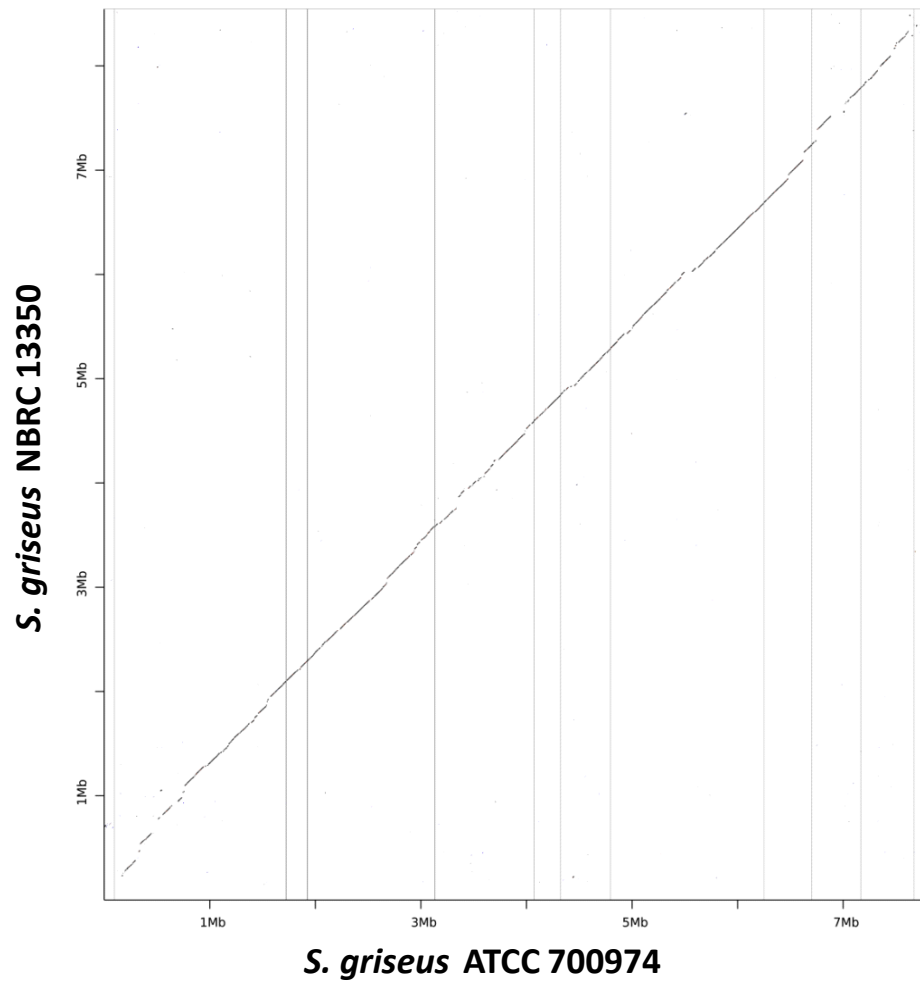

**Supplemental Fig S5.** Comparison between *S. griseus* NBRC 13350 whole genome and ATCC 700974 draft genome.

**A.**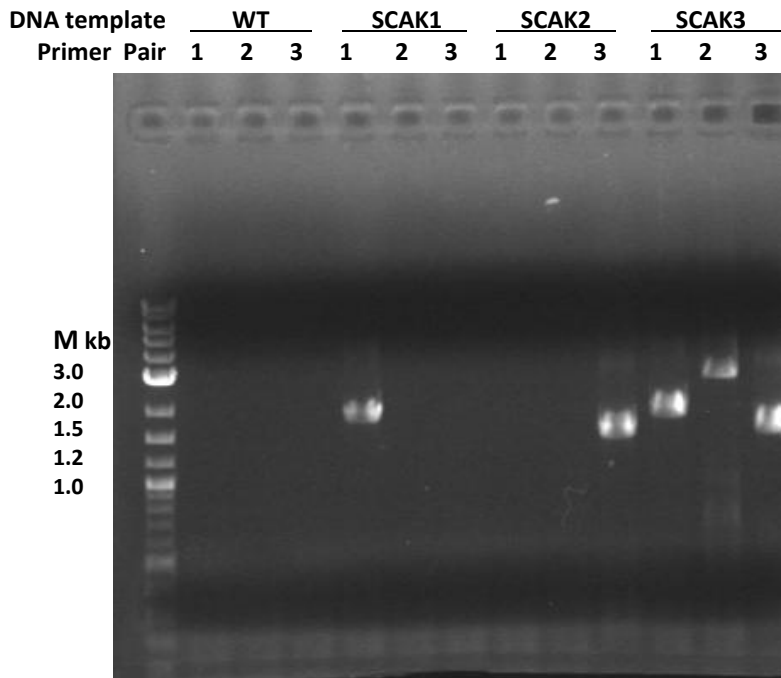

**Supplemental Fig S6.** PCR analysis of the construction of mutants. (A) Gel electrophoresis of the amplified fragments that are the constructed sequences of a *hrdBp* and a specific gene. Forward primer is *hrdBp*-F-BamHI (Table 2). Reverse primers are DirectSinbet-R-BglIII (1), CGS-R-HindIII (2) and *abmD*-R-NheI (3). (B) Diagram of the *attB* locus in WT and engineered strains. PCR product and the length are indicated for each strain.

**B.**

WT

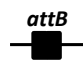

SCAK1 ~1.7 kb (1)

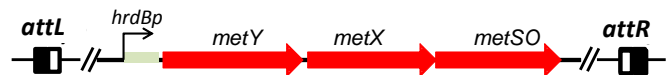

SCAK2 ~1.35 kb (3)

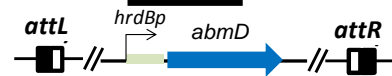

SCAK3 ~1.7 kb (1)

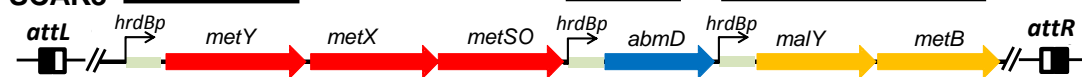

~1.35 kb (3)

~ 2.75 kb (2)

C.

| Primers | $F_0/R_0$ |   |   | $F_0/R_1$ |    |   | $F_1/R_0$ |   |    |   |   |
|---------|-----------|---|---|-----------|----|---|-----------|---|----|---|---|
|         | WT        | 1 | 2 | 3         | WT | 1 | 2         | 3 | WT | 1 | 2 |

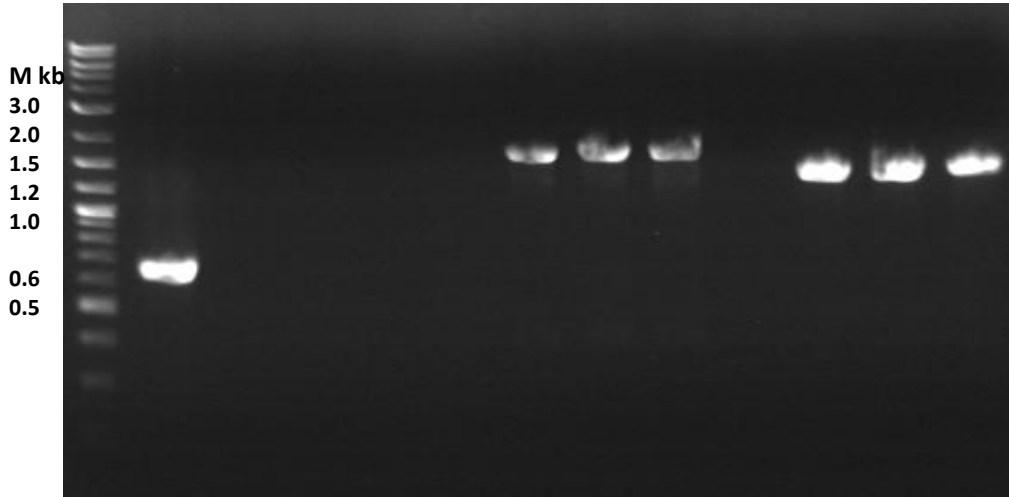

**Supplemental Fig S6 (C)** PCR analysis of WT and SCAK mutants with primers flanking the *attB* or *attB/P* sites. The primer sequences are:  $F_1$ , acacgtggagcgggatcggggattgtc;  $R_1$ , ccg-aaggattcgcataacggttgccg;  $F_0$ , cgagttcaccggc-gatgacgcggagc;  $R_0$ , gccctccgggaatgcgcgacg-ccttg. DNA template from strains: Wild-type (WT); SCAK1 (1); SCAK2 (2); SCAK3 (3). (D) Diagram of the amplicons.

D.

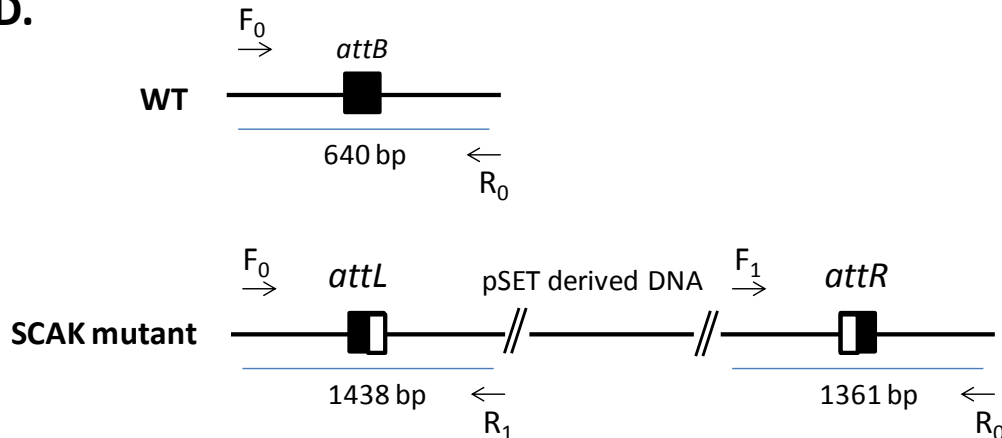

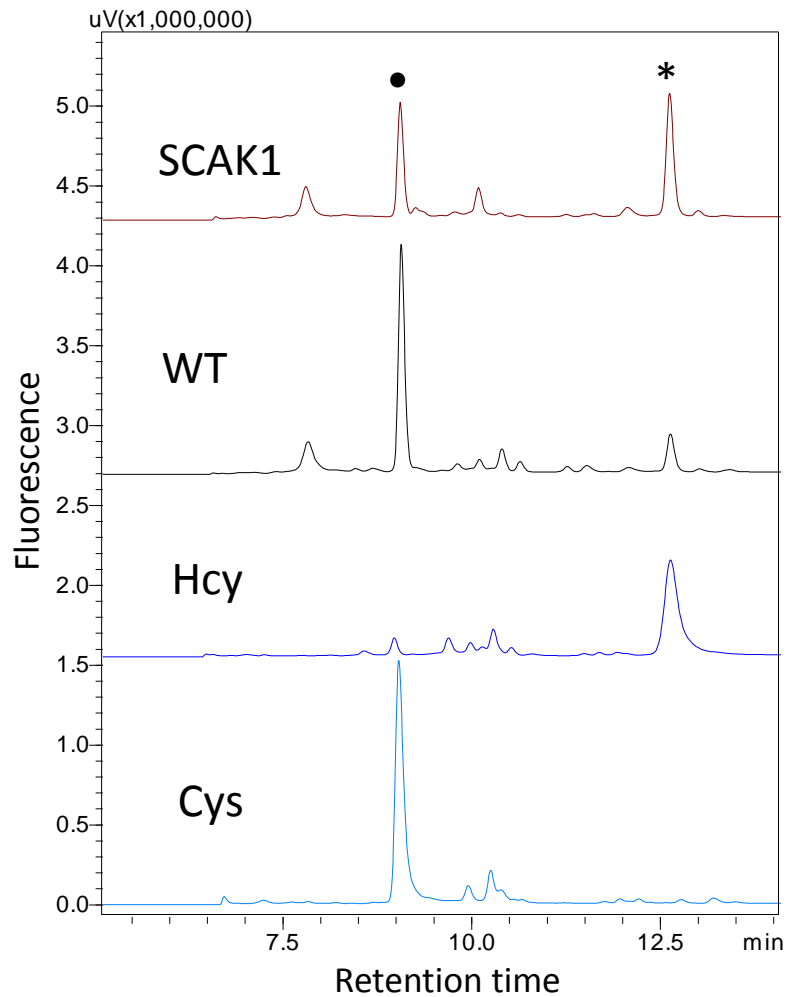

**Supplemental Fig S7.** HPLC – fluorescence detection of intracellular Cys (●) and Hcy (\*) in WT and mutant SCAK1.



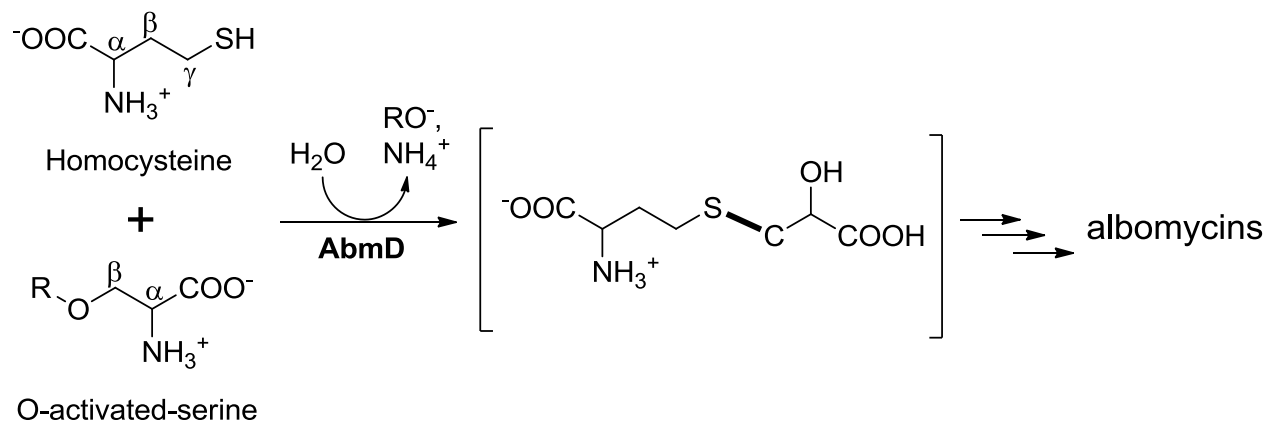

**Supplemental Fig S8.** Proposed AbmD reaction that forms the -C-S-C- group of ABM.
